# Supplementary material for: Moderate Weight Loss Modifies Leptin and Ghrelin Synthesis Rhythms but Not the Subjective Sensations of Appetite in Obesity Patients
Source: PubMed Central journal article supplement (PMC7230904; doi:10.3390/nu12040916), 2020-03-27
Supplement: nutrients-12-00916-s001.pdf [file nutrients-12-00916-s001.pdf]

**Table S1.** Energy and nutrient composition of the test meal supplied to participants.

| <b>Breakfast</b>                                        | Calories<br>/portion | CARBOHYDRATES(g)<br>/portion | Sugars (g)<br>/portion | PROTEINS(g)<br>/portion | FAT(g)<br>/portion | SATURATED FAT(g)<br>/portion | SALT(g)<br>/portion | FIBER(g)<br>)<br>/portion |
|---------------------------------------------------------|----------------------|------------------------------|------------------------|-------------------------|--------------------|------------------------------|---------------------|---------------------------|
| Skimmed Milk (175 ml)<br>[Central Lechera<br>Asturiana] | 84,00                | 14,80                        | 14,80                  | 5,60                    | 0,13               | 0,09                         | 0,09                | 0,00                      |
| Coffee(8g) [Saimaza]                                    | 18,20                | 3,30                         |                        | 1,20                    | 0,04               | 0,02                         |                     | 0,00                      |
| Sugar (4g) [Azucarera<br>Española]                      | 16,00                | 4,00                         |                        | 0,00                    | 0,00               | 0,00                         |                     | 0,00                      |
| Banana (105g)<br>[Hacendado]                            | 81,50                | 17,80                        |                        | 0,91                    | 0,23               | 0,10                         |                     | 2,20                      |
| Cookies (80g;<br>40g/unidad) [All-Bran]                 | 306,00               | 46,00                        | 30,00                  | 3,00                    | 10,00              | 0,80                         | 0,36                | 7,00                      |
|                                                         | 505,70               | 85,90                        | 44,80                  | 10,71                   | 10,40              | 1,00                         | 0,45                | 9,20                      |
| <b>Lunch</b>                                            | Calories<br>/portion | CARBOHYDRATES(g)<br>/portion | Sugars (g)<br>/portion | PROTEINS(g)<br>/portion | FAT(g)<br>/portion | SATURATED<br>FAT(g)/portion  | SALT(g)<br>/portion | FIBER(g)<br>)<br>/portion |
| Sandwich (130g)<br>[Campofrío]                          | 301,00               | 34                           | 1,9                    | 10                      | 10                 | 3                            | 1,8                 | 0,00                      |
| Potato Chips (30g)<br>[Hacendado]                       | 165                  | 15,8                         | 0,22                   | 1,83                    | 10,8               | 1,35                         | 0,3                 | 0,53                      |
| Tangerines (120g)<br>[Hacendado]                        | 20,4                 | 4,2                          |                        | 0,29                    | 0,091              | 0,01                         |                     | 0,82                      |
| Nuts (30g) [Hacendado]                                  | 195                  | 1,3                          |                        | 4,3                     | 18,8               | 2                            |                     | 1,7                       |
| Chocolate Snack (Twix)<br>(50g)                         | 124                  | 16,1                         | 12,2                   | 1,1                     | 6                  | 3,5                          | 0,11                |                           |
|                                                         | 805,4                | 71,4                         | 14,32                  | 17,52                   | 45,69              | 9,86                         | 2,21                | 3,05                      |

| <b>Dinner</b>                      | Calories<br>/portion | CARBOHYDRATES(g)<br>/portion | Sugars (g)<br>/portion | PROTEINS(g)<br>/portion | FAT(g)<br>/portion | SATURATED<br>FAT(g)/portion | SALT(g)<br>/portion | FIBER(g)<br>)<br>/portion |
|------------------------------------|----------------------|------------------------------|------------------------|-------------------------|--------------------|-----------------------------|---------------------|---------------------------|
| Sandwich (130g)<br>[Campofrío]     | 301                  | 34                           | 1,9                    | 10                      | 10                 | 3                           | 1,8                 | 0,00                      |
| Potato Chips (30g)<br>[Hacendado]  | 165                  | 15,8                         | 0,22                   | 1,83                    | 10,8               | 1,35                        | 0,3                 | 0,53                      |
| Tangerines (120g)<br>[Hacendado]   | 20,4                 | 4,2                          |                        | 0,29                    | 0,091              | 0,01                        |                     | 0,82                      |
| Nuts (30g) [Hacendado]             | 195                  | 1,3                          |                        | 4,3                     | 18,8               | 2                           |                     | 1,7                       |
| Apple/cereal Snack<br>[Hero] (30g) | 74                   | 13                           | 5,6                    | 1,3                     | 1,4                | 0,7                         |                     | 2,6                       |
|                                    | 755,4                | 68,3                         | 7,72                   | 17,72                   | 41,09              | 7,06                        | 2,1                 | 5,65                      |

Table S2. Summary of energy and nutrient composition of the test meal.

|                                        | <b>Total Nutrient<br/>Composition</b> |
|----------------------------------------|---------------------------------------|
| <b>Weight (g)</b>                      | 1072                                  |
| <b>Kilocalories</b>                    | 2067,0                                |
| <b>Kjul</b>                            | 8654.12                               |
| <b>Carbohydrates (g)</b>               | 225.60                                |
| <b>% Energy from<br/>Carbohydrates</b> | 50                                    |
| <b>Sugars (g)</b>                      | 66.84                                 |
| <b>Proteins (g)</b>                    | 45.95                                 |
| <b>% Energy from Proteins</b>          | 10                                    |



---

|                      |   |   |   |   |        |       |        |       |
|----------------------|---|---|---|---|--------|-------|--------|-------|
| Acrophase            | - | - | - | - | -0.476 | 0.046 | -      | -     |
| %Rhythmicity         | - | - | - | - | -      | -     | -      | -     |
| <b>Desire to Eat</b> |   |   |   |   |        |       |        |       |
| Mesor                | - | - | - | - | -      | -     | -      | -     |
| Acrophase            | - | - | - | - | -      | -     | -0.513 | 0.030 |
| %Rhythmicity         | - | - | - | - | 0.468  | 0.050 | -      | -     |

---
